# Supplementary material for: Direct and Inverted Repeat stimulated excision (DIRex): Simple, single-step, and scar-free mutagenesis of bacterial genes
Source: PLoS One. 2017 Aug 30;12(8):e0184126. doi: 10.1371/journal.pone.0184126 (PMC5576700; doi:10.1371/journal.pone.0184126)
Supplement: S1 Table — (XLSX) [file pone.0184126.s005.xlsx]

## Sheet: Table S1 - Strains
Strain	Genotype	Note
	S. enterica ssp enterica sv. Typhimurium LT2
DA6192	lab wild-type
DA35728	hisA::Acatsac1	Template strain for amilCP-cat'
DA42246	hisA::Acatsac3	Template strain for 'cat-sacB-amilCP
DA36107	∆hisO hisA(L169R) ∆trpF / pSIM5-Tet (temperature controlled λ Red, TetR)	Recombineering strain for segregation assays using hisA, His- Trp+
DA27238	pSIM5-Tet (temperature controlled λ Red, TetR) in DA6192
DA42835	∆ssrA::<AcatsacA>	Fig. 5A
DA43412	∆ssrA	Fig. 5A
DA48527	∆Pgal::<AcatsacA>	Fig. 5B
DA48533	∆Pgal	Fig. 5B
DA44268	∆araCBAD::<AcatsacA>	Fig. 5C
DA42853	∆ParaE::J23106-<AcatsacA>	Fig. 5E
DA43115	∆ParaE::J23106	Fig. 5E
DA44497	∆araCBAD::<AcatsacA> ∆ParaE::J23106	P22 transduction of ∆araCBAD::<AcatsacA> from DA44268 to DA43115
DA44660	∆araCBAD ∆ParaE::J23106	Selection for sucrose resistant segregants from DA48660
DA48523	∆galE::Tlux-<AcatsacA>	Fig. 5F
DA48606	∆galE::Tlux / pSIM5-Tet (temperature controlled λ Red, TetR)	Fig. 5F
DA48529	∆galE::Tlux	Fig. 5F
DA48663	∆Pgal::<AcatsacA> ∆galE::Tlux	∆Pgal::<AcatsacA> transformed into DA48606
DA48665	∆Pgal ∆galE::Tlux	Selection for sucrose resistant segregants from DA48663
DA42568	hisA(31bp DR)::<AcatsacA>a	Fig. 6B, S1A
DA55229	∆hisO hisA(25bp DR)::<AcatsacA> ∆trpFa	Fig. 6D – E, S1B
DA55227	∆hisO hisA(20bp DR)::<AcatsacA> ∆trpFa	Fig. 6E, S1B
DA55231	∆hisO hisA(30bp DR)::<AcatsacA> ∆trpFa	Fig. 6E, S1B
DA55824	clpA::<AcatsacA>(T354M)	Fig. S2C
DA55828	clpA(T354M)::<AcatsacA>	Fig. S2D
DA55820	rpoS(R141C)::<AcatsacA>	Fig. S2D
DA55816	rpoS::<AcatsacA>(R141C)	Fig. S2E
	E. coli K12 MG1655
DA5438	lab wild-type
DA24100	pSIM5-Tet (temperature controlled λ Red, TetR) in DA5438
DA43405	∆araFGH::<AcatsacA>	Fig. 5D
DA46249	∆araFGH	Fig. 5D
DA42829	∆ParaE::J23106-<AcatsacA>	Fig. 5E
DA46282	∆araFGH ∆ParaE::J23106	P1 transduction of ∆ParaE::J23106-<AcatsacA> from DA42829 to DA46249, followed by sucrose selection
a Only some of the clones and constructs generated for segregation assays were saved in the strain colletion.
